# Supplementary material for: Impaired Spermatogenesis in Infertile Patients with Orchitis and Experimental Autoimmune Orchitis in Rats
Source: MDPI journal article supplement (doi:10.3390/biology13040278), 2024-04-19
Supplement: s1 [file s1]

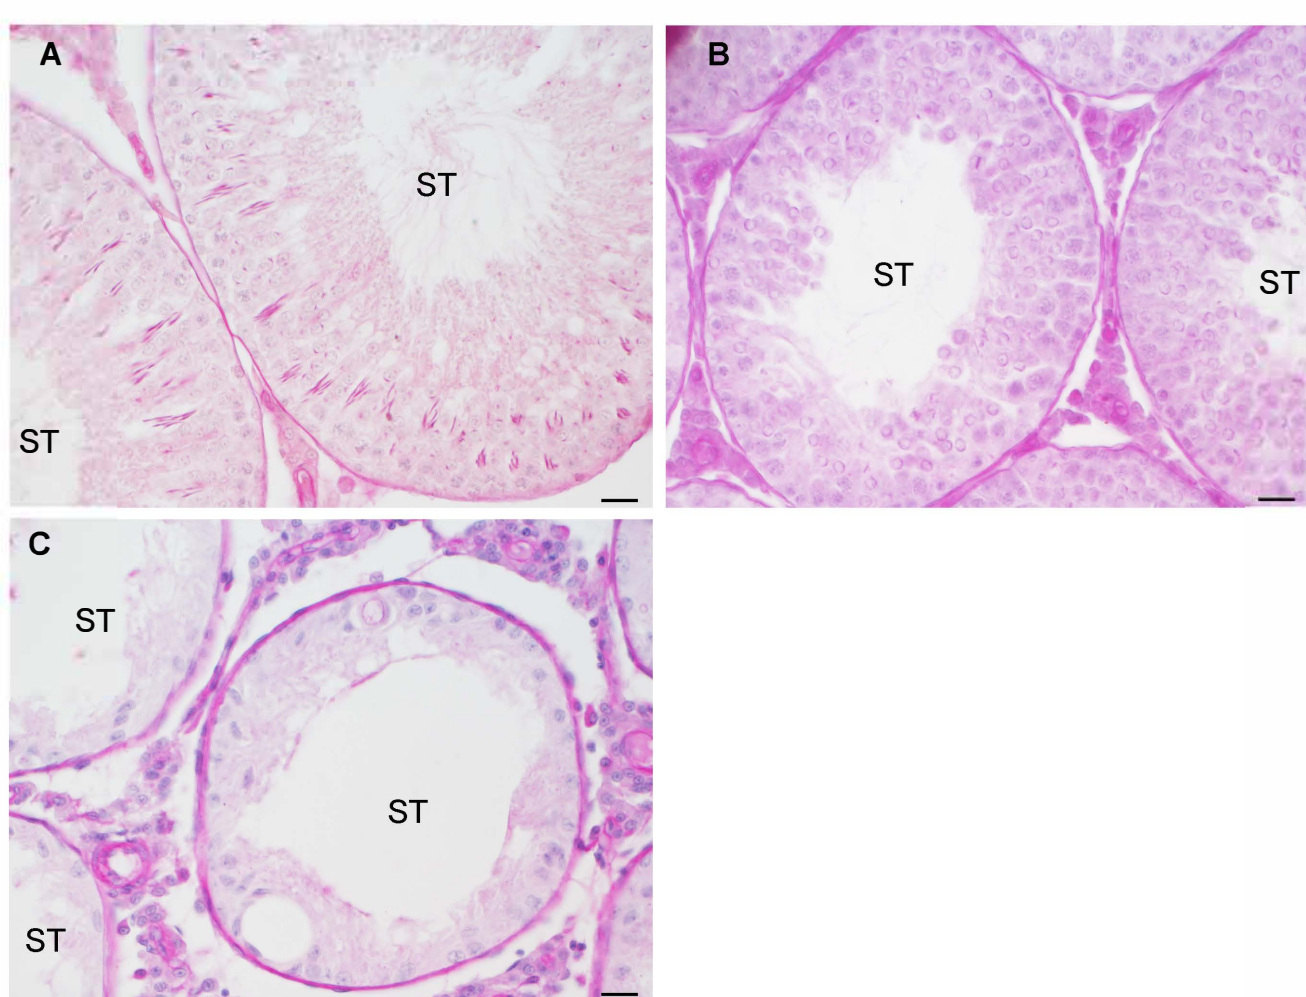

**Figure S2:** Testis sections of untreated (A), focal EAO (B) and severe EAO rats (C ) were stained with PAS. Note seminiferous tubule (ST) thickness in C. Scale bar indicates: 20  $\mu$ m.
