# Supplementary material for: Impaired Spermatogenesis in Infertile Patients with Orchitis and Experimental Autoimmune Orchitis in Rats
Source: MDPI journal article supplement (doi:10.3390/biology13040278), 2024-04-19
Supplement: s1 [file s1]

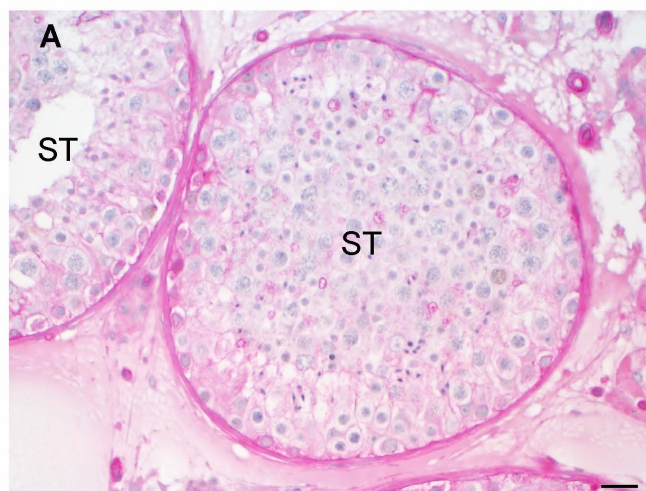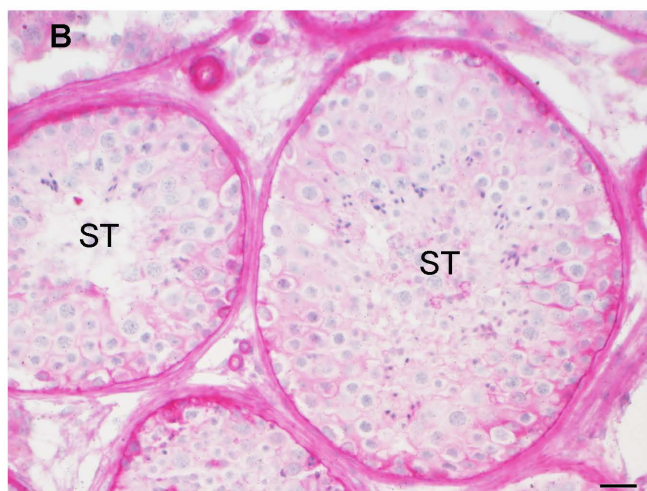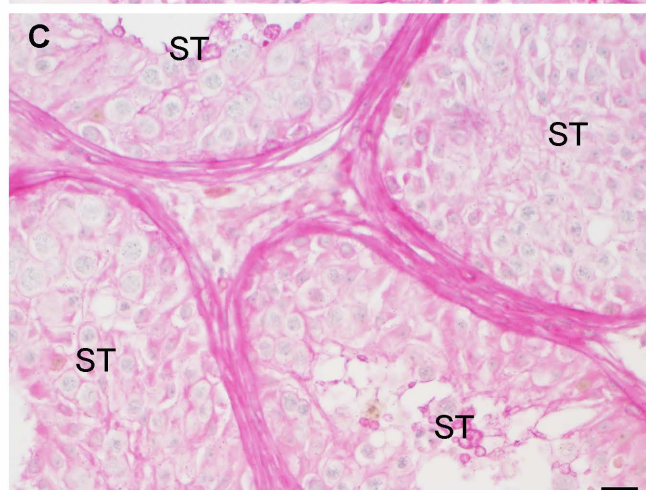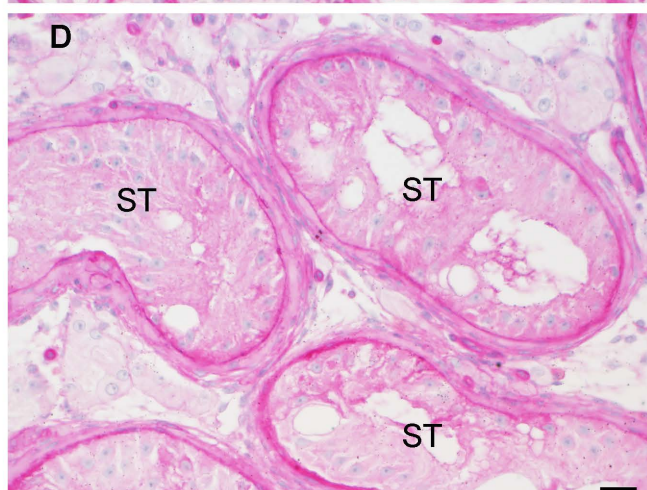

**Figure S1:** Biopsies from patients with complete spermatogenesis (A), mild (B), severe hypospermatogenesis and SCOS (D) were stained with PAS. Note seminiferous tubule (ST) thickness in C and D. Scale bar indicates: 20  $\mu$ m.
