# Supplementary material for: Impaired Spermatogenesis in Infertile Patients with Orchitis and Experimental Autoimmune Orchitis in Rats
Source: MDPI journal article supplement (doi:10.3390/biology13040278), 2024-04-19
Supplement: s1 [file s1]

**Table S1.** *Serum hormonal levels in human and rat orchitis*

|                               | <b>Human<br/>Mild HypoSp</b> | <b>Human<br/>Severe HypoSp</b> | <b>SCOS</b> | <b>Rat<br/>Focal EAO</b>          | <b>Rat<br/>Severe EAO</b> |
|-------------------------------|------------------------------|--------------------------------|-------------|-----------------------------------|---------------------------|
| <b>Serum<br/>Testosterone</b> | unchanged                    | unchanged                      | unchanged   | unchanged [9] /decreased<br>[3,8] | increased [15]            |
| <b>Serum LH</b>               | unchanged                    | unchanged                      | unchanged   | unchanged [8,15]                  | unchanged [15]            |
| <b>Serum FSH</b>              | unchanged                    | increased                      | increased   | increased [8,15]                  | increased [15]            |
| <b>Serum PRL</b>              | unchanged                    | unchanged                      | unchanged   | unchanged                         | unchanged                 |

Data from patients with Mild hypospermatogenesis (Mild HypoSp), severe hypospermatogenesis (Severe HypoSp) and Sertoli cell-only syndrome (SCOS) were compared with the data from patients with Complete spermatogenesis.

Data from rats with focal and severe orchitis were compared with the non-immunized rats.

PRL: prolactin.
